# Supplementary material
Source: PubMed Central journal article supplement (PMC4977370)
Supplement: supp_WNL.0000000000002940_Supplementary_Data.pdf [file supp_WNL.0000000000002940_Supplementary_Data.pdf]

## SUPPLEMENTARY DATA

## TABLES

**Table e-1.** Linear correlations between rTPJ functional connectivity and disease duration

| <b>Brain region</b>      | <b>L/R</b> | <b>r (p-value)</b> |
|--------------------------|------------|--------------------|
| Posterior cingulate      | L/R        | -0.20 (0.26)       |
| Precuneus                | L/R        | -0.15 (0.40)       |
| Middle temporal gyrus    | R          | 0.01 (0.96)        |
| Insula                   | R          | -0.11 (0.52)       |
| Middle cingulate gyrus   | L          | -0.21 (0.23)       |
| Inferior parietal lobule | R          | -0.23 (0.19)       |
| SMA                      | L/R        | -0.26 (0.13)       |
| Middle occipital gyrus   | L          | -0.22 (0.20)       |
| Precentral gyrus         | R          | -0.15 (0.40)       |
| Postcentral gyrus        | R          | -0.12 (0.51)       |
| Declive (vermis)         | L          | -0.19 (0.27)       |
| Superior frontal gyrus   | L          | -0.01 (0.95)       |
| Superior frontal gyrus   | L          | -0.19 (0.29)       |
| Middle frontal gyrus     | L          | -0.18 (0.29)       |
| Middle temporal gyrus    | L          | -0.06 (0.72)       |

Abbreviations: rTPJ, right temporoparietal junction

**Table e-2.** rTPJ functional connectivity in medicated vs. non-medicated FMD patients

| Brain region             | L/R | Cluster size (mm <sup>3</sup> ) | rTPJ FC   |               | p-value |
|--------------------------|-----|---------------------------------|-----------|---------------|---------|
|                          |     |                                 | Medicated | Non-medicated |         |
| Posterior cingulate      | L/R | 1347                            | 0.064     | 0.045         | 0.64    |
| Precuneus                | L/R | 383                             | 0.124     | 0.084         | 0.30    |
| Middle temporal gyrus    | R   | 126                             | 0.131     | 0.138         | 0.89    |
| Insula                   | R   | 106                             | 0.082     | 0.069         | 0.74    |
| Middle cingulate gyrus   | L   | 99                              | 0.121     | 0.105         | 0.65    |
| Inferior parietal lobule | R   | 95                              | 0.081     | 0.041         | 0.33    |
| SMA                      | L/R | 74                              | 0.069     | 0.054         | 0.68    |
| Middle occipital gyrus   | L   | 62                              | 0.084     | 0.071         | 0.76    |
| Precentral gyrus         | R   | 59                              | 0.085     | 0.073         | 0.82    |
| Postcentral gyrus        | R   | 54                              | 0.091     | 0.053         | 0.44    |
| Declive (vermis)         | L   | 42                              | 0.082     | 0.056         | 0.44    |
| Superior frontal gyrus   | L   | 38                              | 0.022     | 0.155         | 0.02    |
| Superior frontal gyrus   | L   | 30                              | 0.067     | 0.046         | 0.62    |
| Middle frontal gyrus     | L   | 29                              | 0.055     | 0.072         | 0.58    |
| Middle temporal gyrus    | L   | 28                              | 0.033     | 0.031         | 0.96    |

FC presented as mean correlation coefficients. *p*-values were determined using two-sided student's *t*-test.

Abbreviations: rTPJ, right temporo-parietal junction; FMD, functional movement disorders; FC, functional connectivity; SMA, supplementary motor area

**FIGURE LEGENDS**

**Figure e-1.** Pattern of V1 connectivity to visual cortex is consistent with eyes-closed condition in HCs and FMD patients

(A)

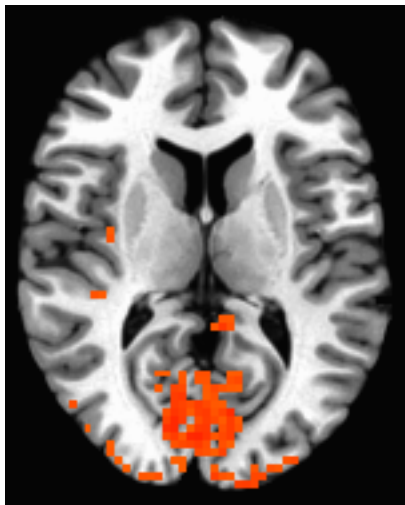

$z = 9$

(B)

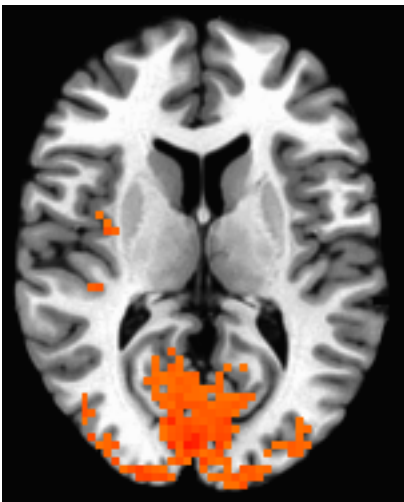

$z = 9$

Connectivity maps demonstrating high degree of correlation within the visual cortex in HCs (A) and FMD patients (B). The z coordinates represent MNI coordinates. Images are in radiological convention.
